# Supplementary material for: Acquisition of epithelial-mesenchymal transition phenotype in the tamoxifen-resistant breast cancer cell: a new role for G protein-coupled estrogen receptor in mediating tamoxifen resistance through cancer-associated fibroblast-derived fibronectin and β1-integrin signaling pathway in tumor cells
Source: PubMed Central journal article supplement (PMC4453053; doi:10.1186/s13058-015-0579-y), 2015-05-21
Supplement: 13058_2015_579_MOESM1_ESM.pdf [file 13058_2015_579_MOESM1_ESM.pdf]

**Table S1**

| <b>NO.</b>               | <b>5'</b>  | <b>STEM</b>           | <b>Loop</b> | <b>STEM</b>           | <b>3'</b> |
|--------------------------|------------|-----------------------|-------------|-----------------------|-----------|
| ITGB1-RNAi<br>(1753-1)-a | Ccgg       | aaGACGATTTGGAGAATGTAA | TTCAAGAGA   | TTACATTCTCCAAATCGTCtt | TTTTTg    |
| ITGB1-RNAi<br>(1753-1)-b | aattcaaaaa | aaGACGATTTGGAGAATGTAA | TCTCTTGAA   | TTACATTCTCCAAATCGTCtt |           |
| ITGB1-RNAi<br>(1754-2)-a | Ccgg       | gaGGCTCCAAAGATATAAAGA | TTCAAGAGA   | TCTTTATATCTTTGGAGCCtc | TTTTTg    |
| ITGB1-RNAi<br>(1754-2)-b | aattcaaaaa | gaGGCTCCAAAGATATAAAGA | TCTCTTGAA   | TCTTTATATCTTTGGAGCCtc |           |
| ITGB1-RNAi<br>(1755-1)-a | Ccgg       | aaGTCAGCAGTAGGAACATTA | TTCAAGAGA   | TAATGTTCTACTGCTGACtt  | TTTTTg    |
| ITGB1-RNAi<br>(1755-1)-b | aattcaaaaa | aaGTCAGCAGTAGGAACATTA | TCTCTTGAA   | TAATGTTCTACTGCTGACtt  |           |
| ITGB1-RNAi<br>(1756-1)-a | Ccgg       | gaGGAATGGTGTGTTGCAAGT | TTCAAGAGA   | ACTTGCAAACACCATTTCctc | TTTTTg    |
| ITGB1-RNAi<br>(1756-1)-b | aattcaaaaa | gaGGAATGGTGTGTTGCAAGT | TCTCTTGAA   | ACTTGCAAACACCATTTCctc |           |
| NC-a                     | CCGG       | TTCTCCGAACGTGTCACGT   | TTCAAGAGA   | ACGTGACACGTTCCGGAGAA  | TTTTTg    |
| NC-b                     | AATTCAAAAA | TTCTCCGAACGTGTCACGT   | AAGTTCTCT   | ACGTGACACGTTCCGGAGAA  |           |
