# Supplementary material for: Acquisition of epithelial-mesenchymal transition phenotype in the tamoxifen-resistant breast cancer cell: a new role for G protein-coupled estrogen receptor in mediating tamoxifen resistance through cancer-associated fibroblast-derived fibronectin and β1-integrin signaling pathway in tumor cells
Source: PubMed Central journal article supplement (PMC4453053; doi:10.1186/s13058-015-0579-y), 2015-05-21
Supplement: 13058_2015_579_MOESM2_ESM.pdf [file 13058_2015_579_MOESM2_ESM.pdf]

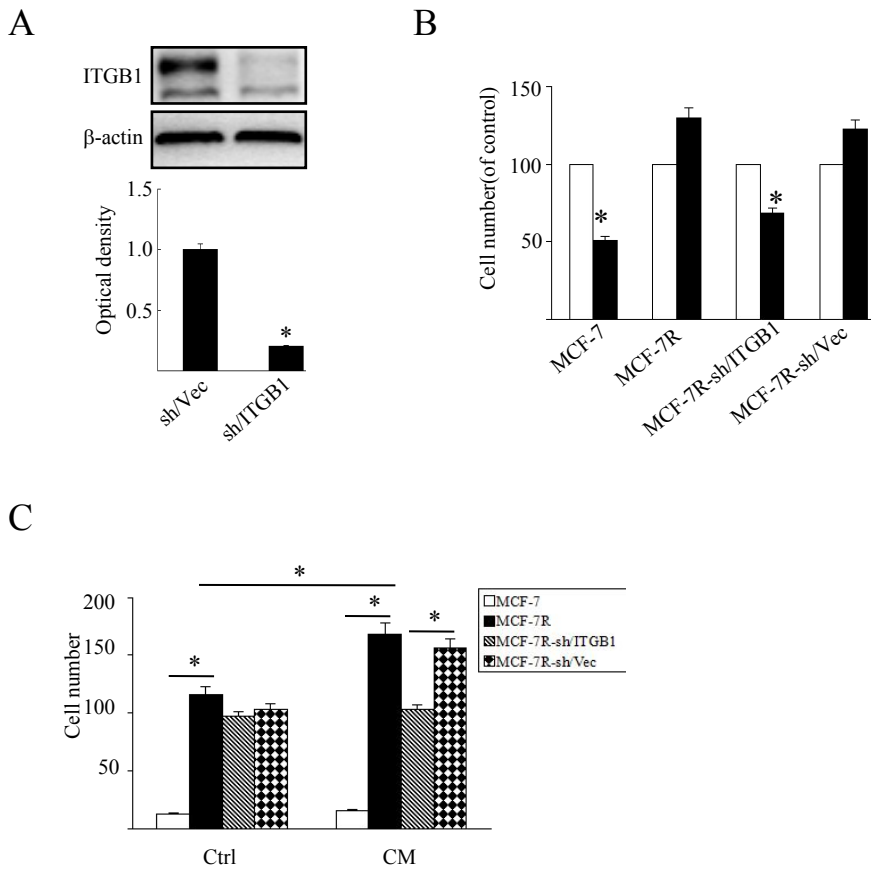

Figure S1

A

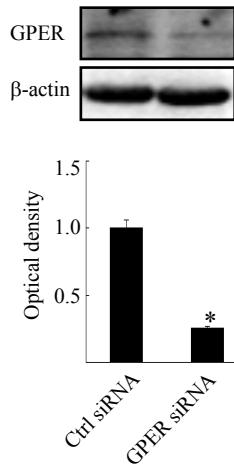

B

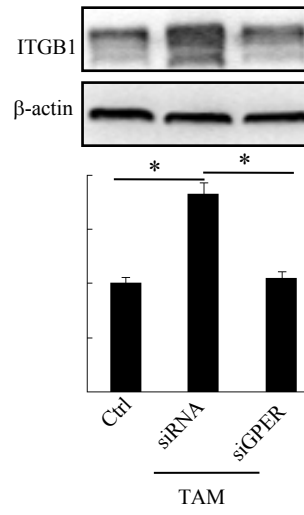

Figure S2

**A**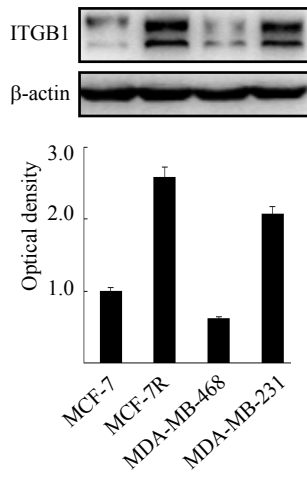**B**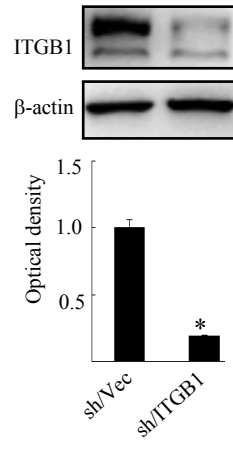**C**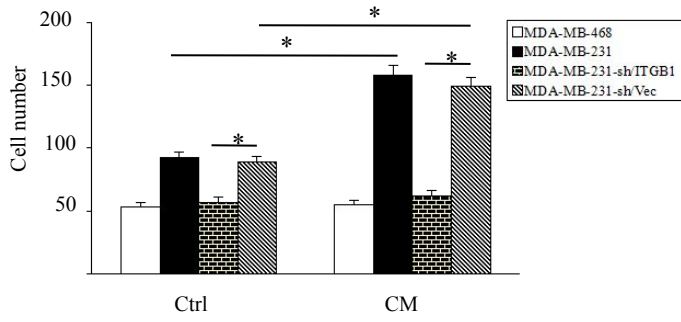**Figure S3**

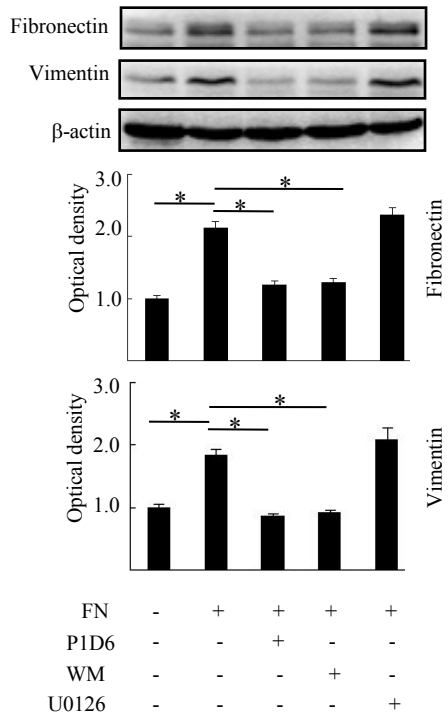

Figure S4
